# Supplementary material for: UPLC-QTOF-MS-guided isolation of anti-COPD ginsenosides from wild ginseng
Source: Royal Society of Chemistry journal article supplement (doi:10.1039/c9ra06635g), 2019-01-01
Supplement: c9ra06635g1.pdf [file c9ra06635g1.pdf]

## SUPPLEMENTARY MATERIAL

### UPLC-QTOF-MS-guided isolation of anti-COPD ginsenosides from Wild Ginseng

Hailin Zhu<sup>a</sup>, Junli Liu<sup>a</sup>, Hongqiang Lin<sup>a</sup>, Ying Zhang<sup>a,c</sup>, Na Yang<sup>a</sup>, Baisong Zhou<sup>a</sup>,

Zhongyao Wang<sup>a</sup>, Alan Chen-Yu Hsu<sup>d</sup>, Jinping Liu<sup>a,b\*</sup>, Pingya Li<sup>a\*</sup>

<sup>a</sup>School of Pharmaceutical Sciences, Jilin University, Changchun 130021, Jilin, China

<sup>b</sup>Research Center of Natural Drug, Jilin University, Changchun 130021, Jilin, China

<sup>c</sup>The First Hospital of Jilin University, Changchun 130021, Jilin, China

<sup>d</sup>Priority Research Centre for Healthy Lungs, Faculty of Health and Medicine, The University of Newcastle, Newcastle, NSW, Australia

\*Co-Correspondence authors: Prof. Jinping Liu and Prof. Pingya Li, School of Pharmaceutical Sciences, Jilin University, Fujin Road 1266, Changchun 130021, China, E-mail: liujp@jlu.edu.cn (J.L.); lipy@jlu.edu.cn (P.L.) Tel.: +86-431-85619803 (J.L.)

#### Contents of Supplementary Information

Figure S1-1. <sup>1</sup>H NMR spectrum of Rm1 in DMSO-D<sub>6</sub> (600 MHz).

Figure S1-2. <sup>13</sup>C-DEPT NMR spectrum of Rm1 in DMSO-D<sub>6</sub> (150 MHz).

Figure S1-3. Heteronuclear multiple quantum correlation (HMQC) spectrum of Rm1.

Figure S1-4. Heteronuclear multiple bond coherence (HMBC) spectrum of Rm1.

Figure S1-5. High resolution electrospray ionization mass spectroscopy (HRESIMS) spectrum of MS<sup>E</sup> fragment ions of Rm1.

Figure S2-1. <sup>1</sup>H NMR spectrum of Rm2 in DMSO-D<sub>6</sub> (600 MHz).

Figure S2-2. <sup>13</sup>C-DEPT NMR spectrum of Rm2 in DMSO-D<sub>6</sub> (150 MHz).

Figure S2-3. Heteronuclear multiple quantum correlation (HMQC) spectrum of Rm2.

Figure S2-4. Heteronuclear multiple bond coherence (HMBC) spectrum of Rm2.

Figure S2-5. High resolution electrospray ionization mass spectroscopy (HRESIMS) spectrum of MS<sup>E</sup> fragment ions of Rm2.

Figure S3-1. <sup>1</sup>H NMR spectrum of Rm3 in DMSO-D<sub>6</sub> (600 MHz).

Figure S3-2. <sup>13</sup>C-DEPT NMR spectrum of Rm3 in DMSO-D<sub>6</sub> (150 MHz).

Figure S3-3. Heteronuclear multiple quantum correlation (HMQC) spectrum of Rm3.

Figure S3-4. Heteronuclear multiple bond coherence (HMBC) spectrum of Rm3.

Figure S3-5. High resolution electrospray ionization mass spectroscopy (HRESIMS) spectrum of MS<sup>E</sup> fragment ions of Rm3.

Figure S4-1. <sup>1</sup>H NMR spectrum of Rm4 in DMSO-D<sub>6</sub> (600 MHz).

Figure S4-2. <sup>13</sup>C-DEPT NMR spectrum of Rm4 in DMSO-D<sub>6</sub> (150 MHz).

Figure S4-3. Heteronuclear multiple quantum correlation (HMQC) spectrum of Rm4.

Figure S4-4. Heteronuclear multiple bond coherence (HMBC) spectrum of Rm4.

Figure S4-5. High resolution electrospray ionization mass spectroscopy (HRESIMS) spectrum of MS<sup>E</sup> fragment ions of Rm4.

Figure S5-1. <sup>1</sup>H NMR spectrum of Rb2 in Pyridine-D<sub>5</sub>(600 MHz).

Figure S5-2. <sup>13</sup>C-DEPT NMR spectrum of Rb2 in Pyridine-D<sub>5</sub> (150 MHz).

Figure S6-1. <sup>1</sup>H NMR spectrum of Rd in Pyridine-D<sub>5</sub>(600 MHz).

Figure S6-2. <sup>13</sup>C-DEPT NMR spectrum of Rd in Pyridine-D<sub>5</sub> (150 MHz).

Figure S7-1. <sup>1</sup>H NMR spectrum of Rg3 in DMSO-D<sub>6</sub> (600 MHz).

Figure S7-2. <sup>13</sup>C-DEPT NMR spectrum of Rg3 in DMSO-D<sub>6</sub> (150 MHz).

Figure S8-1. <sup>1</sup>H NMR spectrum of Rg1 in DMSO-D<sub>6</sub> (600 MHz).

Figure S8-2. <sup>13</sup>C-DEPT NMR spectrum of Rg1 in Pyridine-D<sub>6</sub> (150 MHz).

Figure S9-1. <sup>1</sup>H NMR spectrum of Rh2 in DMSO-D<sub>6</sub> (600 MHz).

Figure S9-2. <sup>13</sup>C-DEPT NMR spectrum of Rh2 in DMSO-D<sub>6</sub> (150 MHz).

Figure S10. Anti-inflammatory effect of petroleum ether soluble extracts (PEe), ethyl acetate soluble extracts(ASE) , n-butanol soluble extracts(BSe) (200 μM)(A), FrA-J(B) and G1-6(C) on the inflammatory cytokine tumor necrosis factor- $\alpha$  (TNF- $\alpha$ ), interleukin-1 $\beta$  (IL-1 $\beta$ ) and interleukin-6 (IL-6) in CSE-exposed A549 cells.

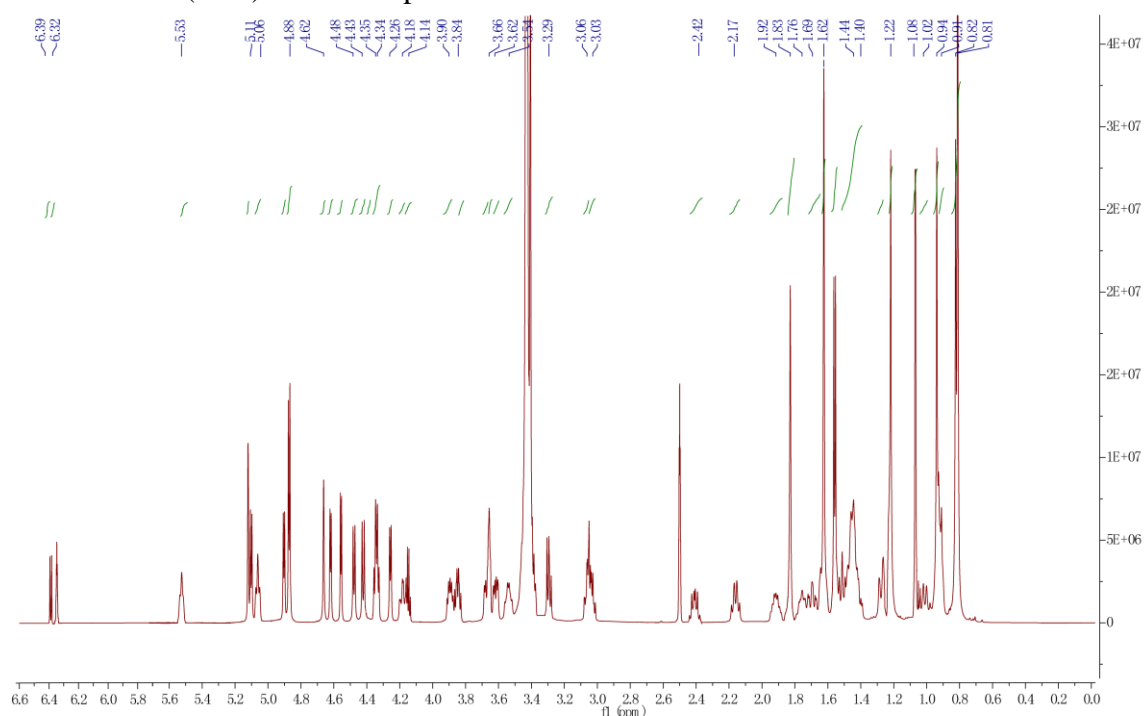

Figure S1-1. <sup>1</sup>H NMR spectrum of Rm1 in DMSO-D<sub>6</sub> (600 MHz).

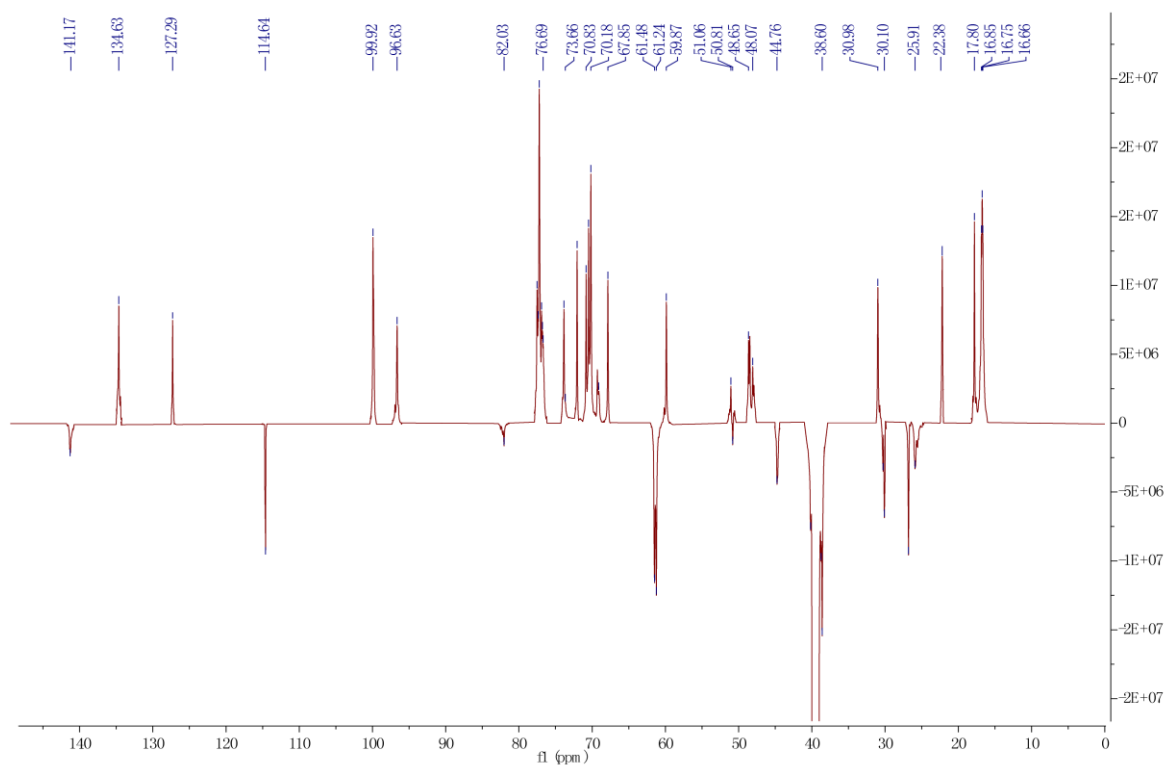

Figure S1-2.  $^{13}\text{C}$ -DEPT NMR spectrum of Rm1 in  $\text{DMSO-D}_6$  (150 MHz).

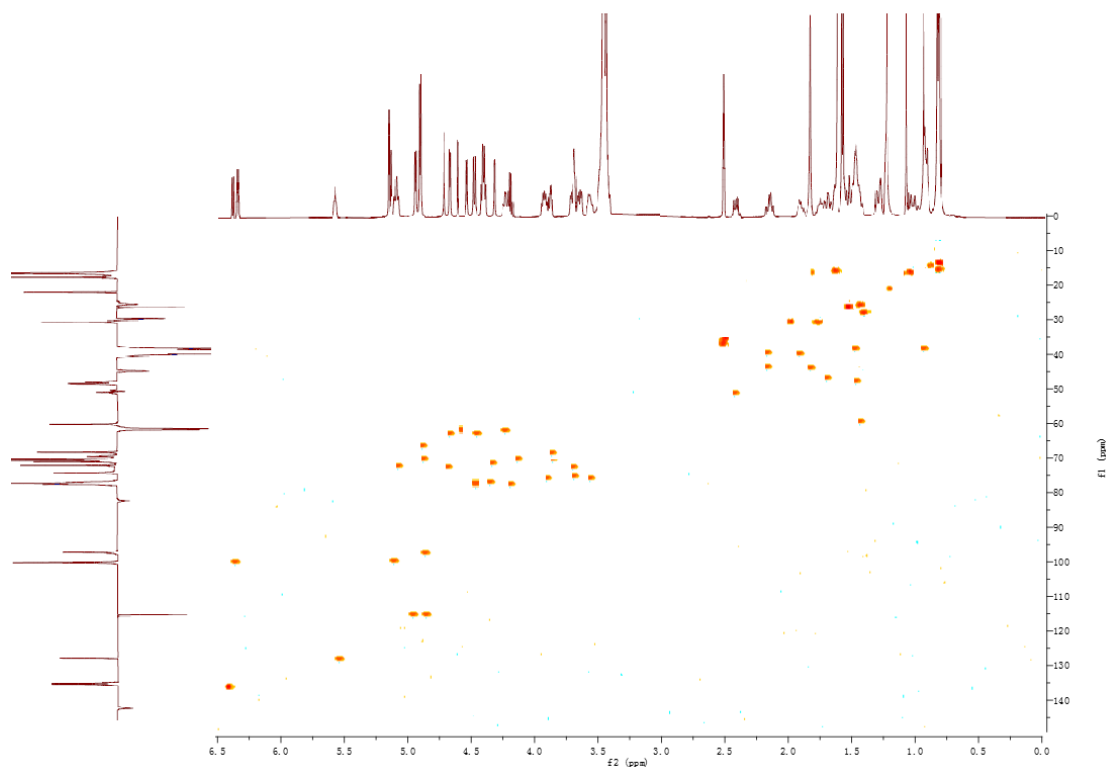

Figure S1-3. Heteronuclear multiple quantum correlation (HMQC) spectrum of Rm1.

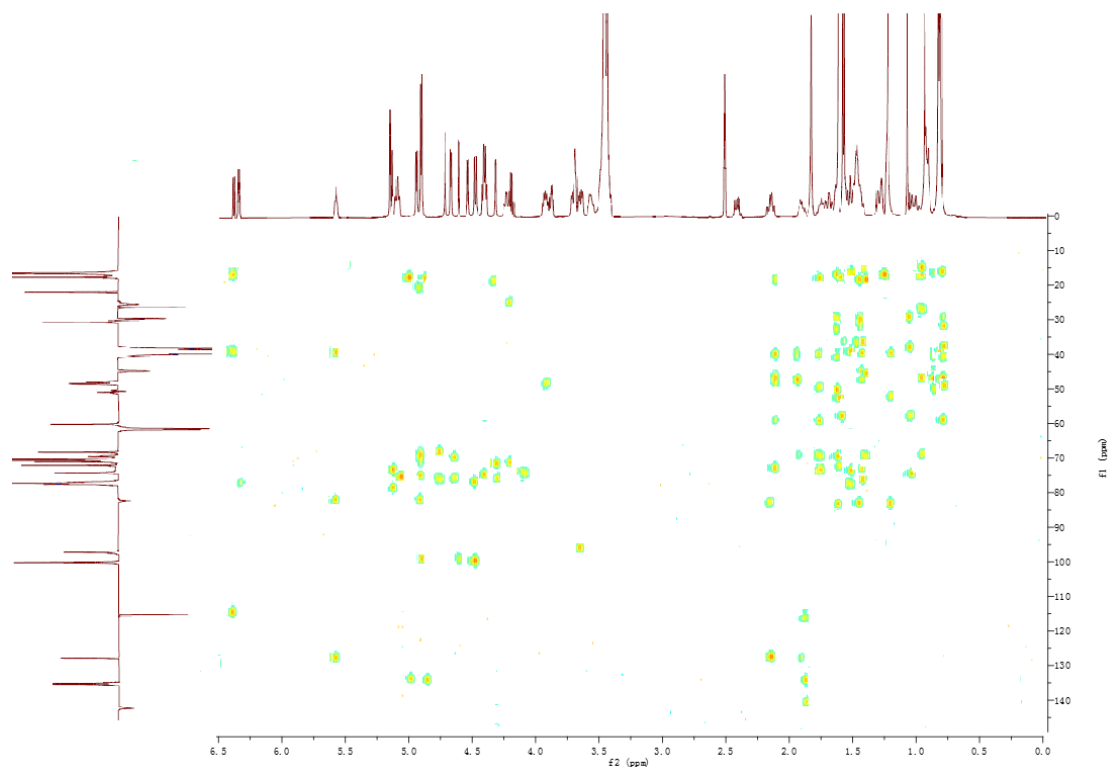

Figure S1-4. Heteronuclear multiple bond coherence (HMBC) spectrum of Rm1.

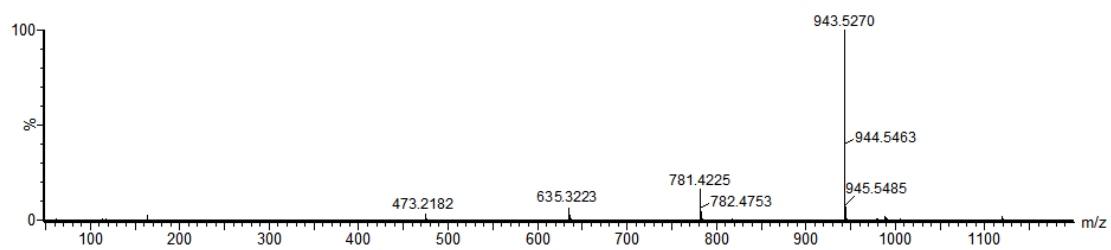

Figure S1-5. High resolution electrospray ionization mass spectrometry (HRESIMS) spectrum of  $MS^E$  fragment ions of Rm1.

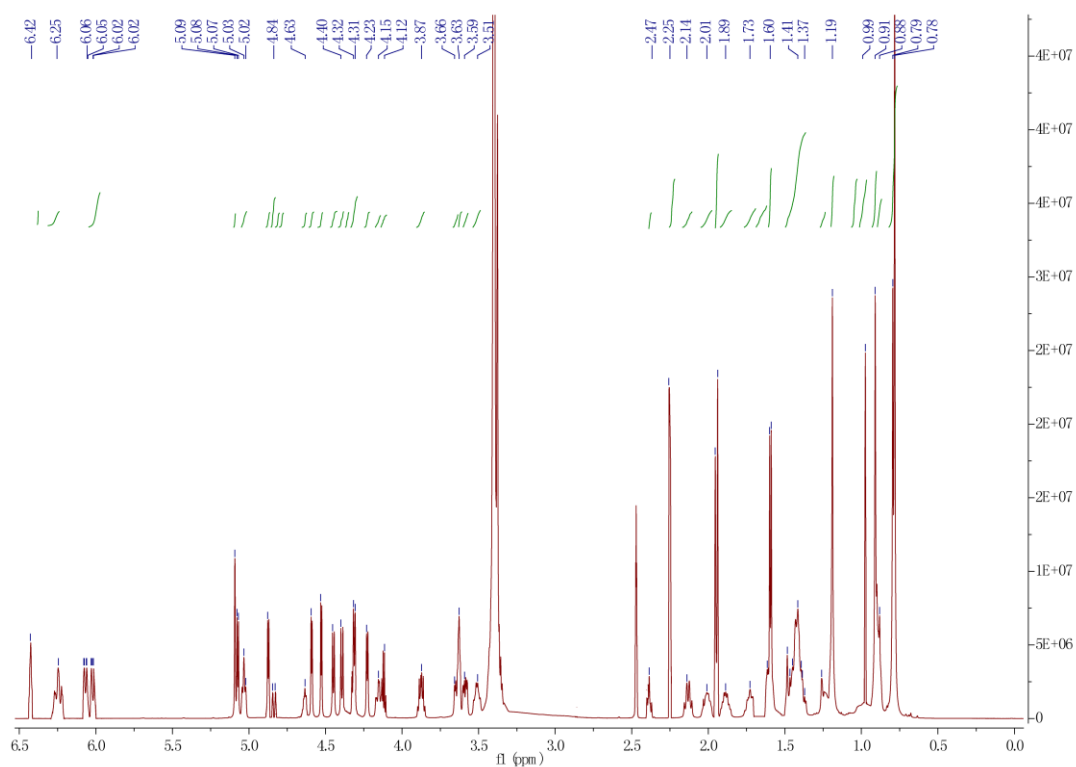

Figure S2-1.  $^1\text{H}$  NMR spectrum of Rm2 in  $\text{DMSO-D}_6$  (600 MHz).

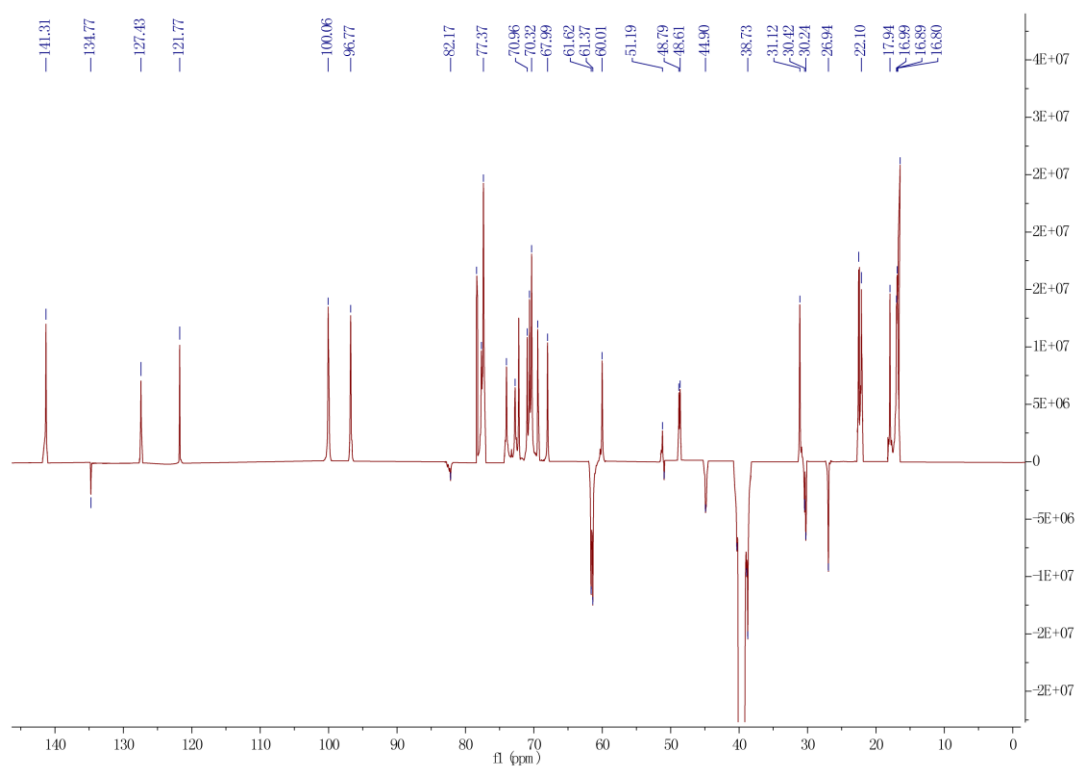

Figure S2-2.  $^{13}\text{C}$ -DEPT NMR spectrum of Rm2 in  $\text{DMSO-D}_6$  (150 MHz).

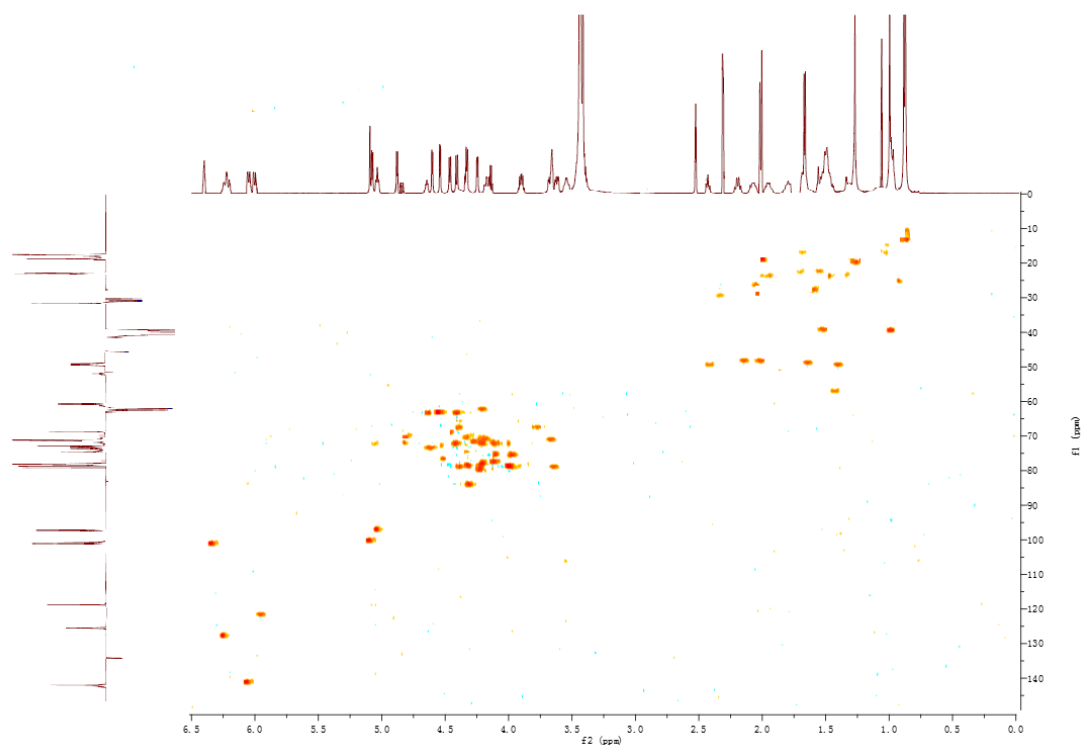

Figure S2-3. Heteronuclear multiple quantum correlation (HMQC) spectrum of Rm2.

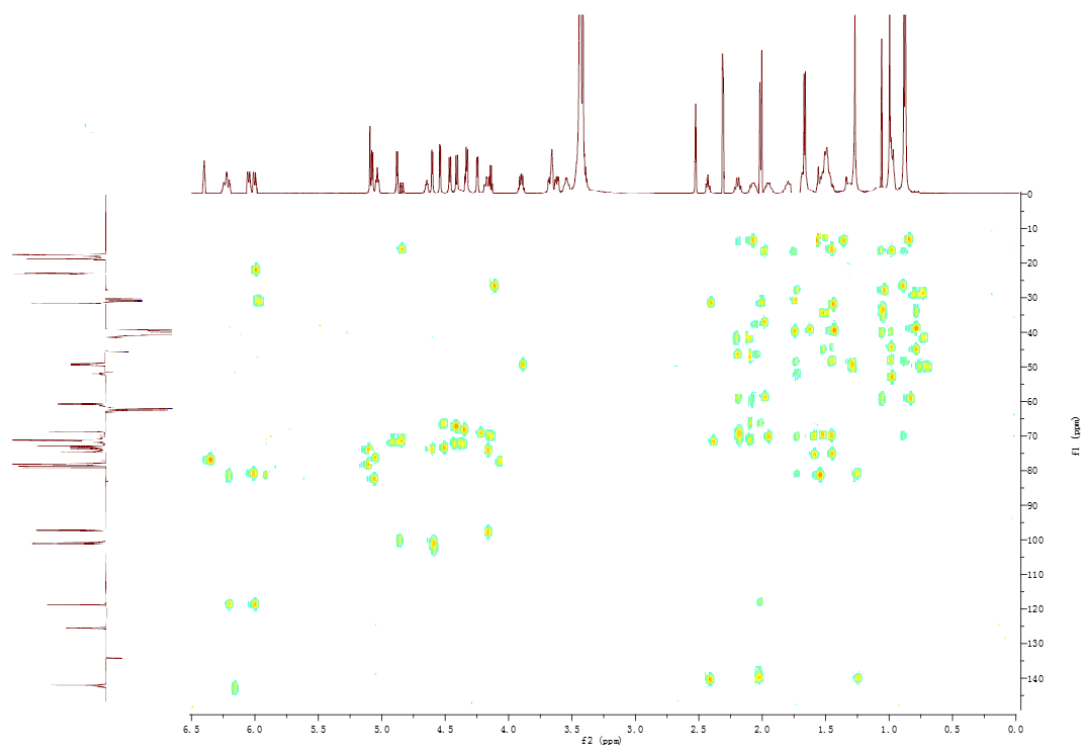

Figure S2-4. Heteronuclear multiple bond coherence (HMBC) spectrum of Rm2.

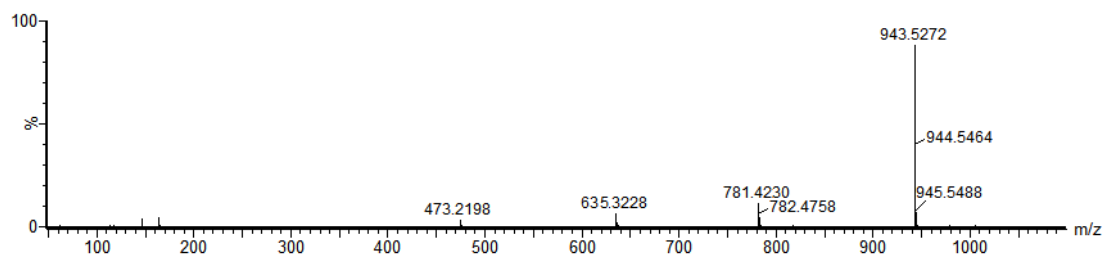

Figure S2-5. High resolution electrospray ionization mass spectroscopy (HRESIMS) spectrum of MS<sub>E</sub> fragment ions of Rm2.

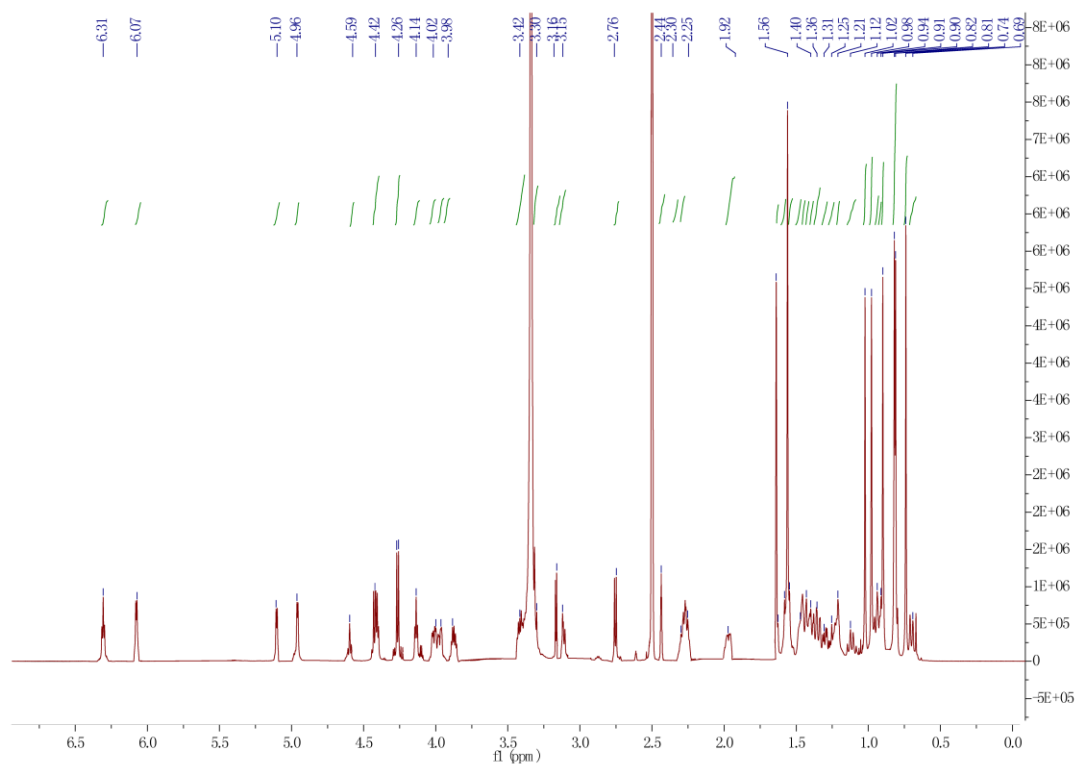

Figure S3-1. <sup>1</sup>H NMR spectrum of Rm3 in DMSO-D<sub>6</sub> (600 MHz).

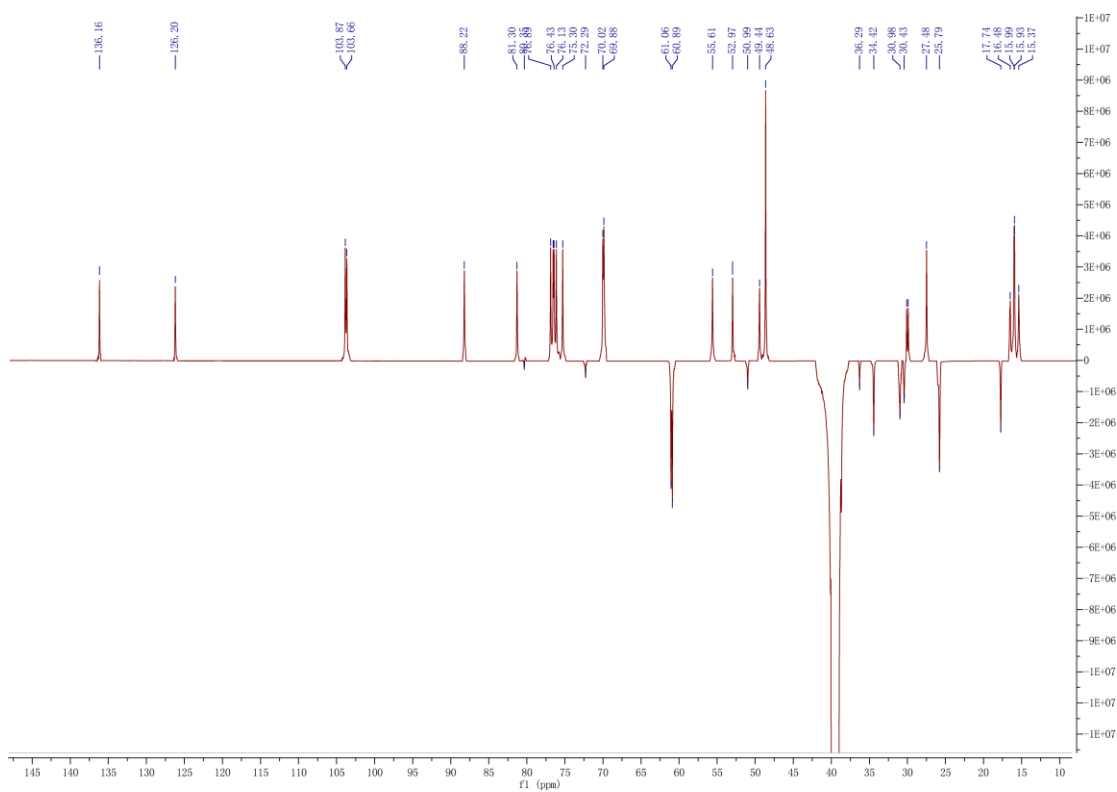

Figure S3-2.  $^{13}\text{C}$ -DEPT NMR spectrum of Rm3 in  $\text{DMSO-D}_6$  (150 MHz).

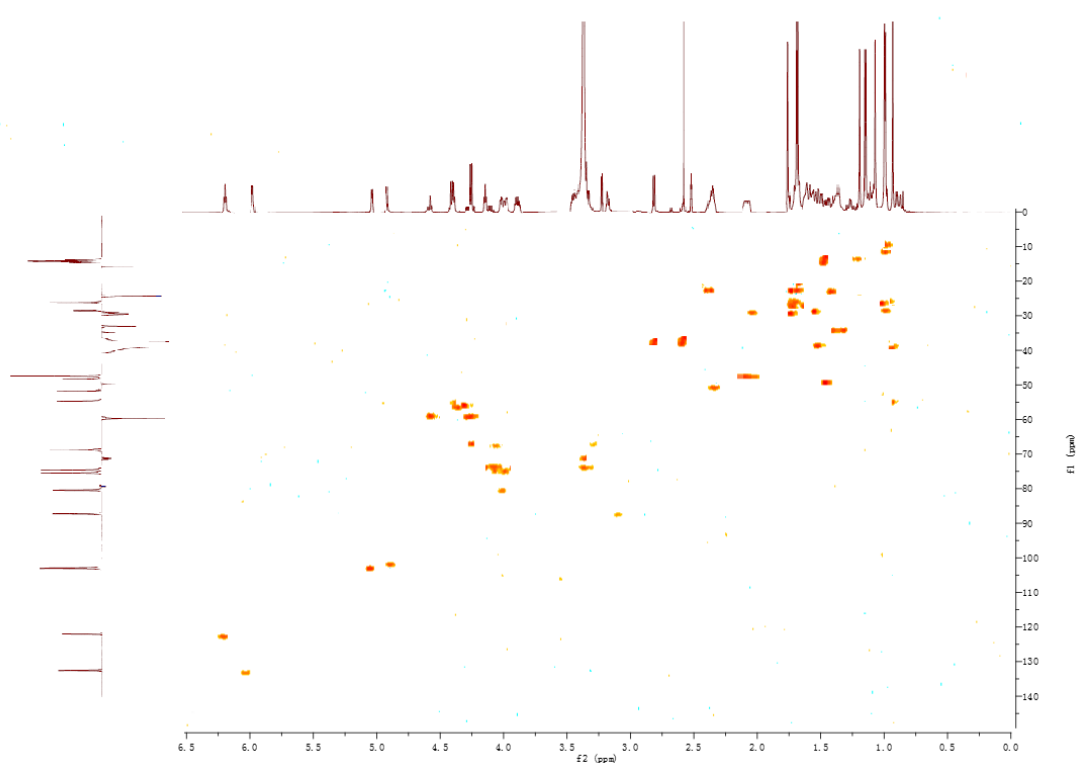

Figure S3-3. Heteronuclear multiple quantum correlation (HMQC) spectrum of Rm3.



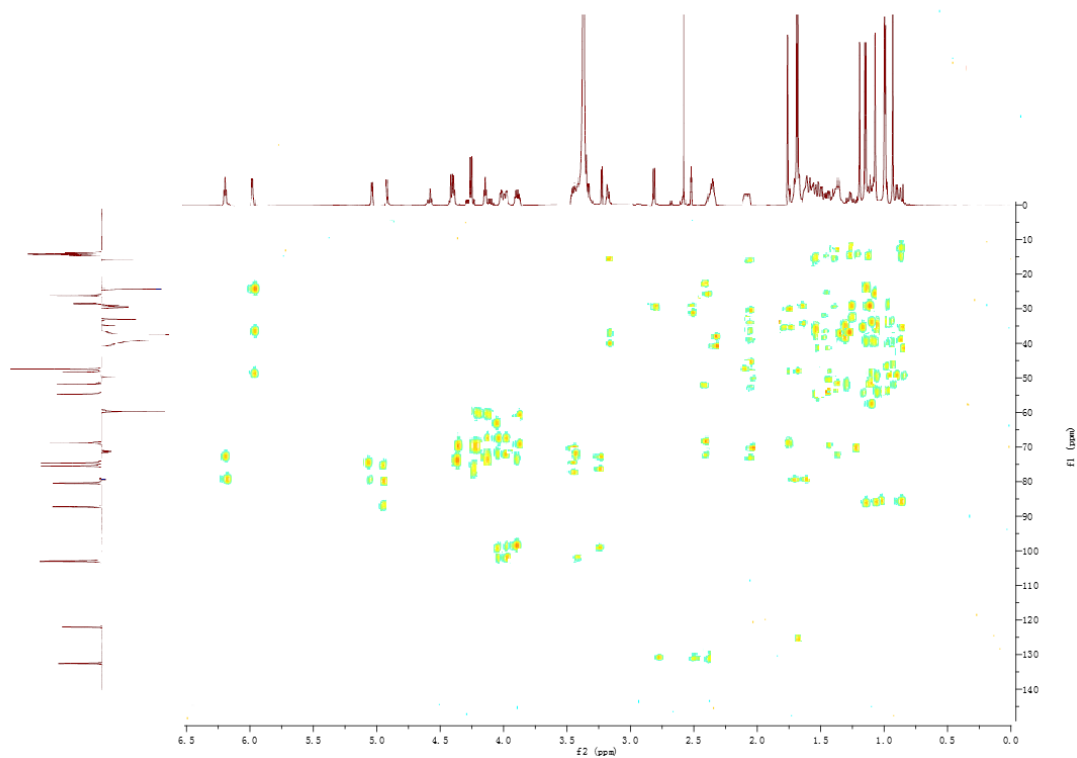

Figure S3-4. Heteronuclear multiple bond coherence (HMBC) spectrum of Rm3.

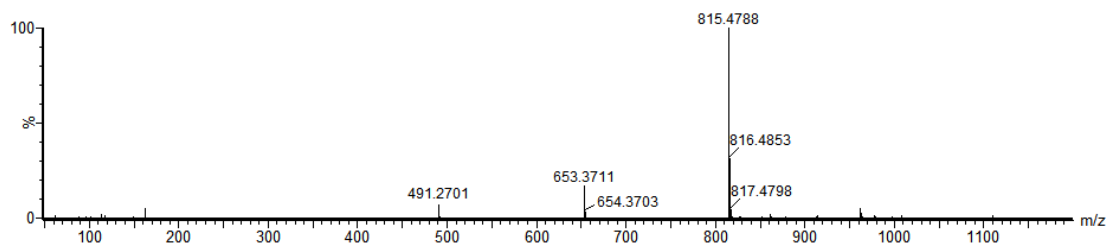

Figure S3-5. High resolution electrospray ionization mass spectrometry (HRESIMS) spectrum of  $MS_E$  fragment ions of Rm3.

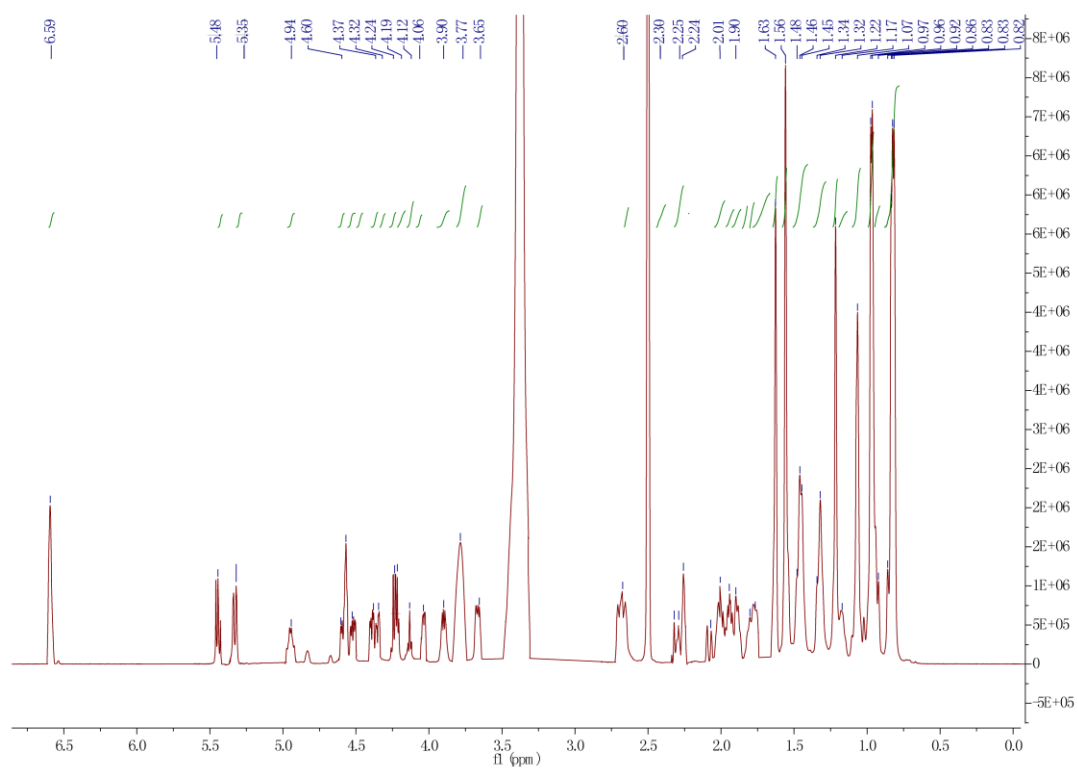

Figure S4-1.  $^1\text{H}$  NMR spectrum of Rm4 in  $\text{DMSO-D}_6$  (600 MHz).

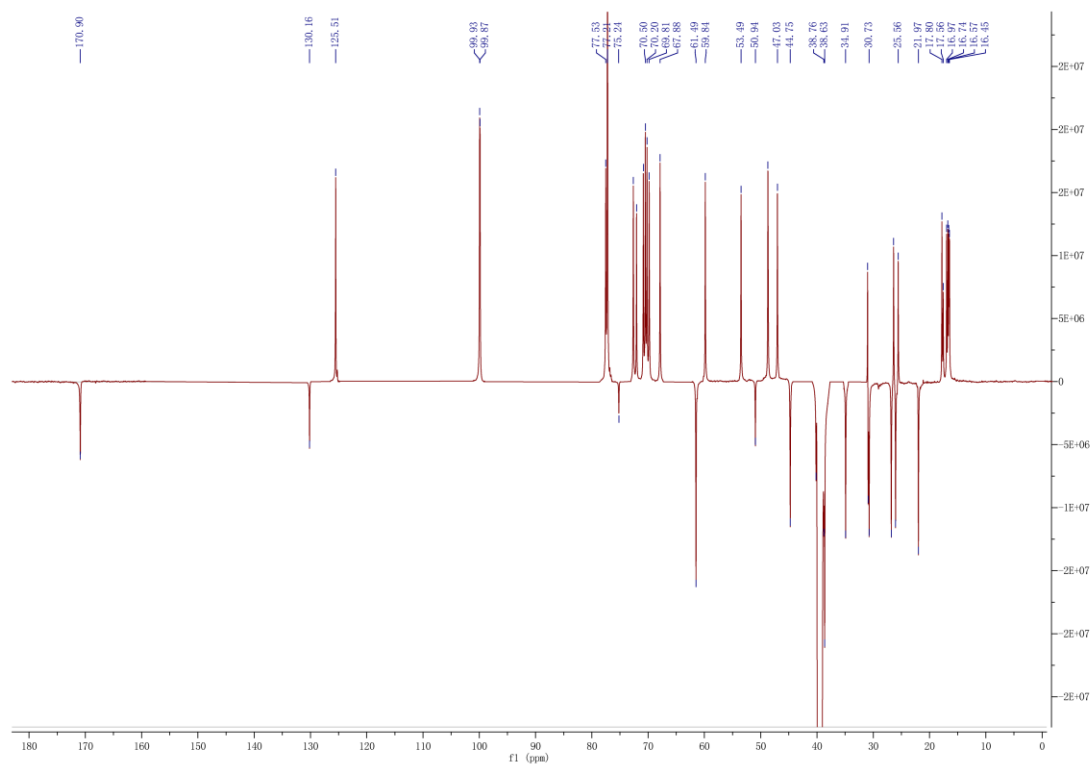

Figure S4-2.  $^{13}\text{C}$ -DEPT NMR spectrum of Rm4 in  $\text{DMSO-D}_6$  (150 MHz).

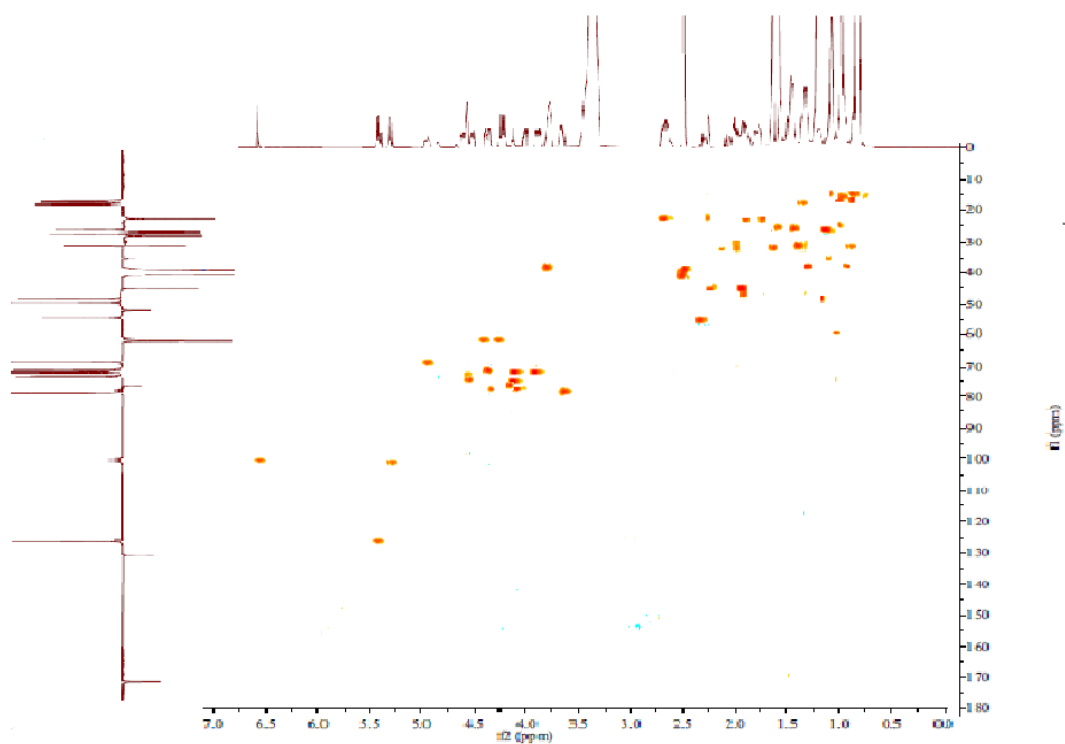

Figure S4-3. Heteronuclear multiple quantum correlation (HMQC) spectrum of Rm4.

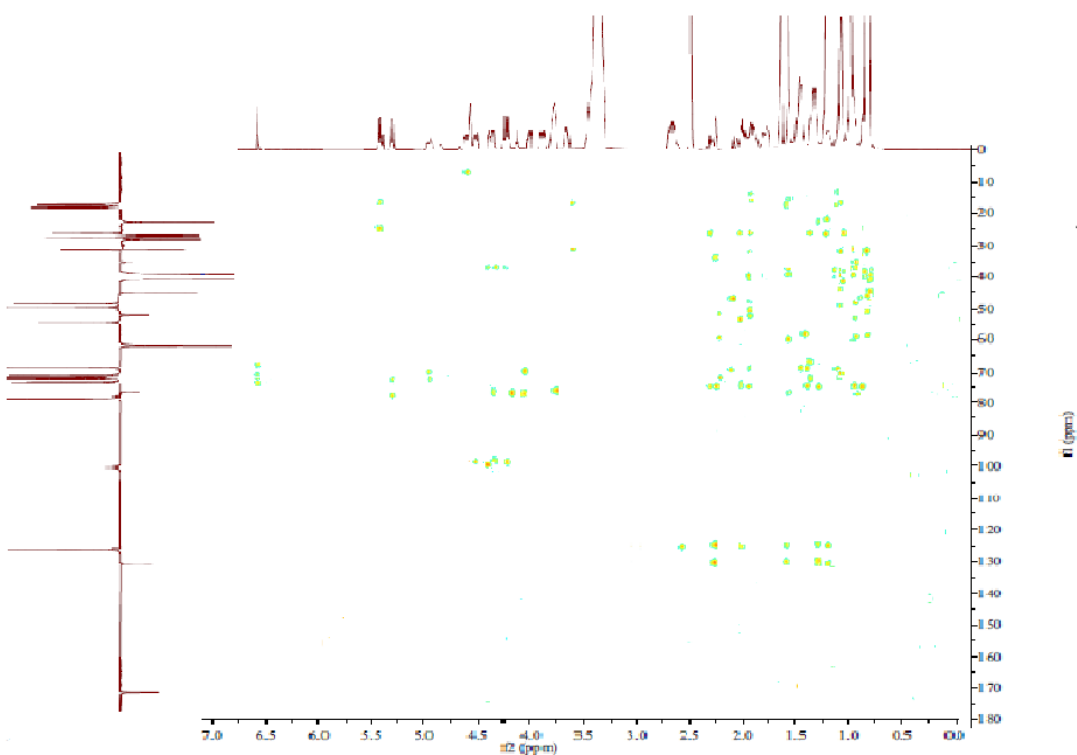

Figure S4-4. Heteronuclear multiple bond coherence (HMBC) spectrum of Rm4.

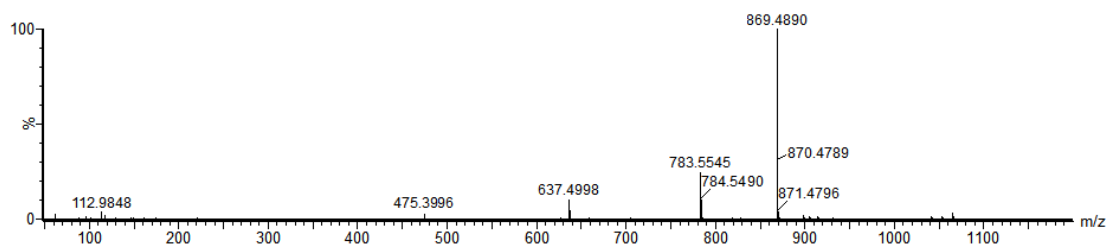

Figure S4-5. High resolution electrospray ionization mass spectroscopy (HRESIMS) spectrum of  $MS_E$  fragment ions of Rm4.

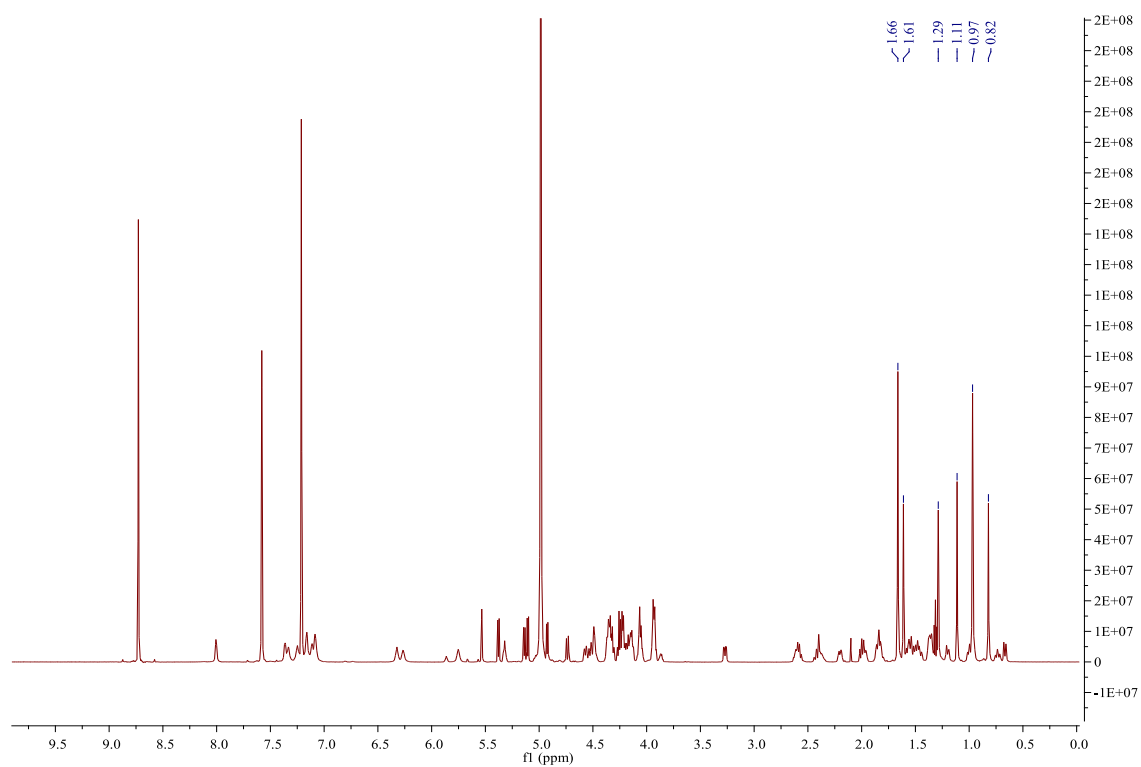

Figure S5-1.  $^1H$  NMR spectrum of Rb2 in Pyridine- $D_5$  (600 MHz).

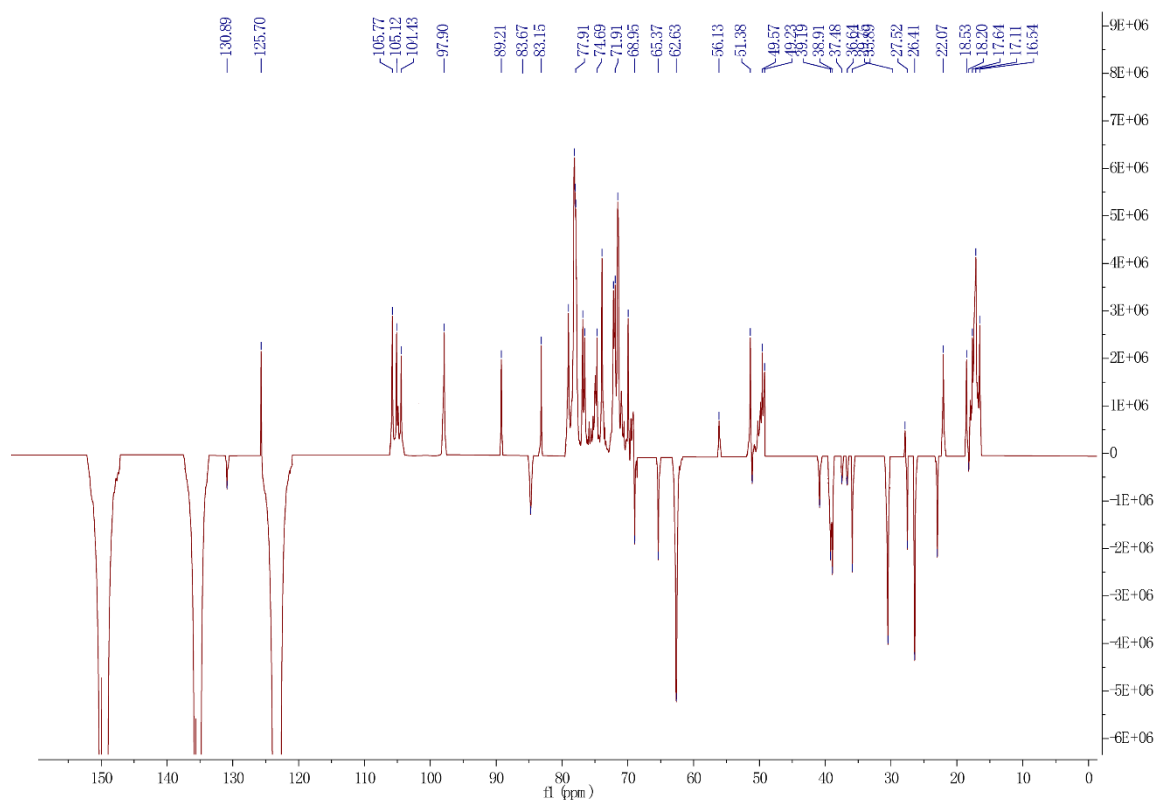

Figure S5-2.  $^{13}\text{C}$ -DEPT NMR spectrum of Rb2 in Pyridine- $\text{D}_5$  (150 MHz).

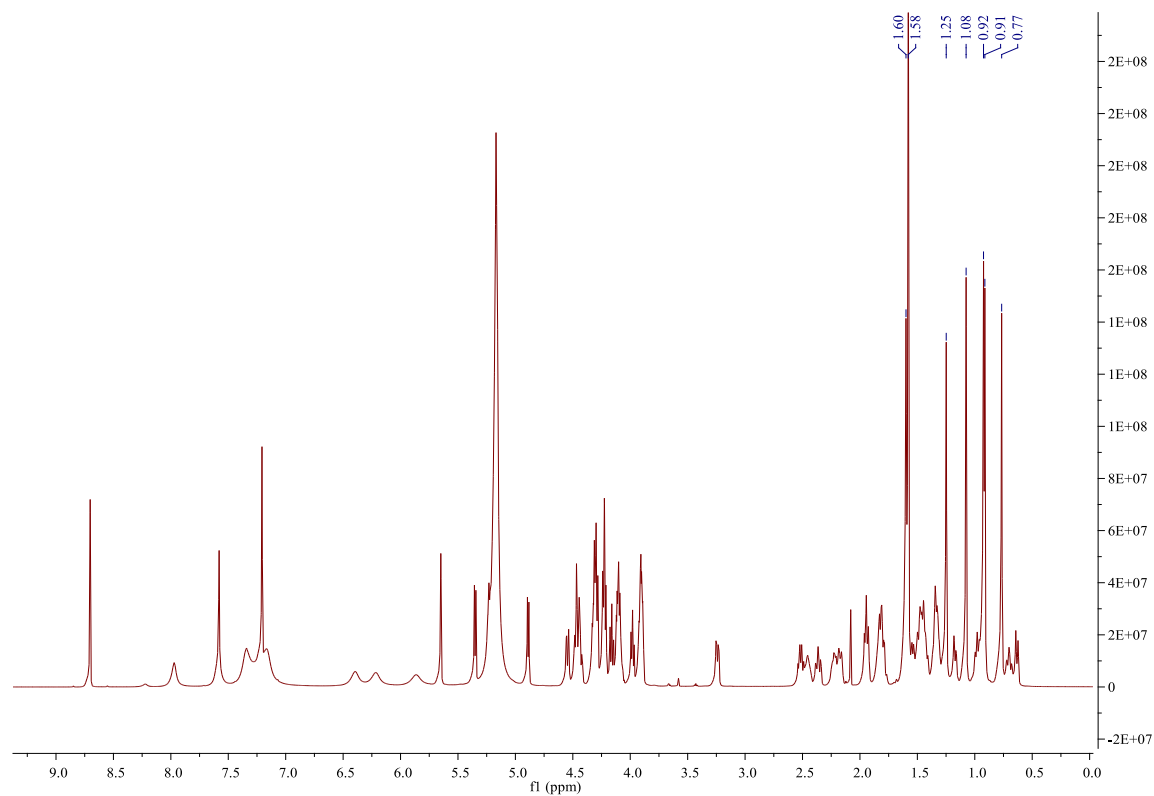

Figure S6-1.  $^1\text{H}$  NMR spectrum of Rd in Pyridine- $\text{D}_5$  (600 MHz).

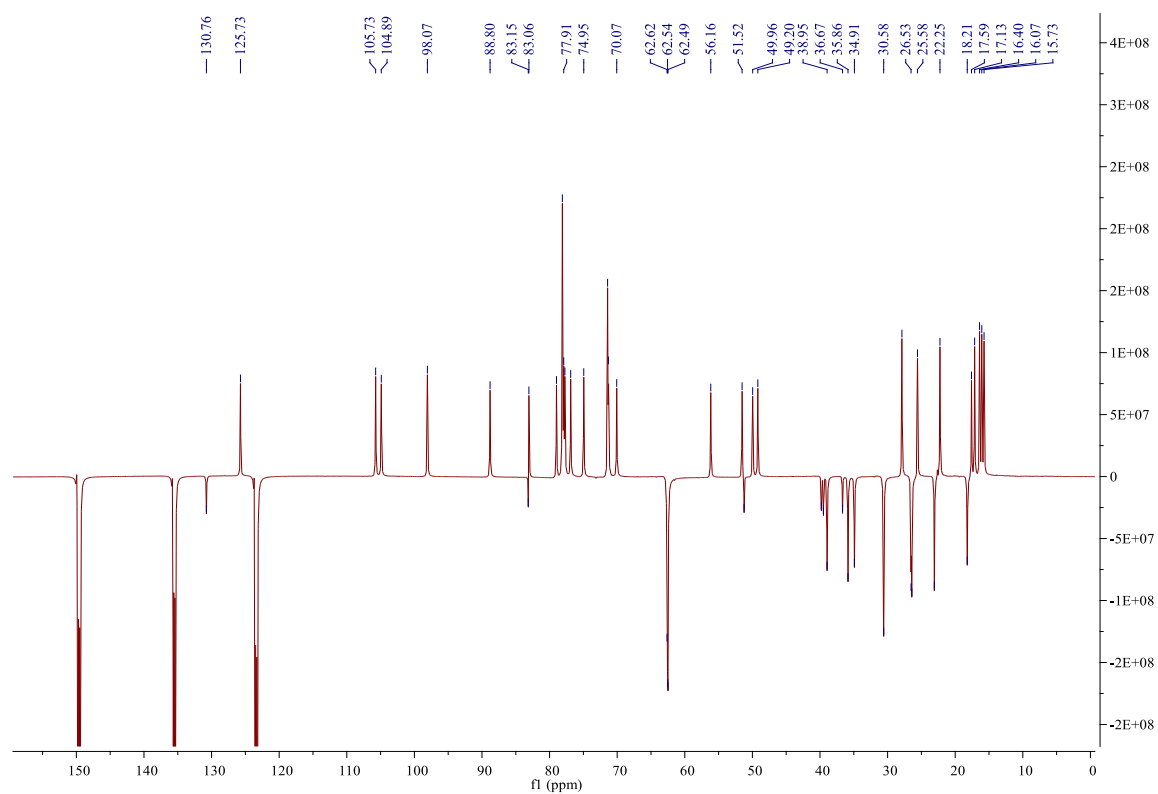

Figure S6-2.  $^{13}\text{C}$ -DEPT NMR spectrum of Rd in Pyridine- $\text{D}_5$  (150 MHz).

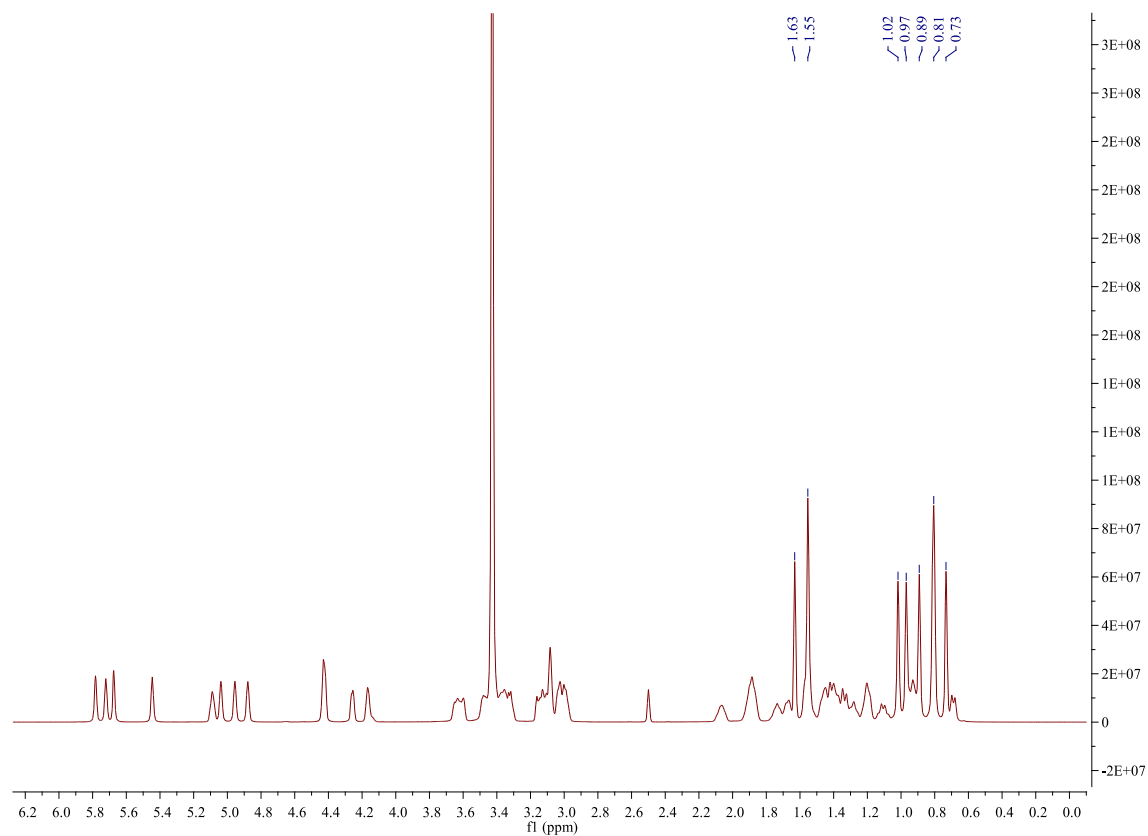

Figure S7-1.  $^1\text{H}$  NMR spectrum of Rg3 in DMSO- $\text{D}_6$  (600 MHz).

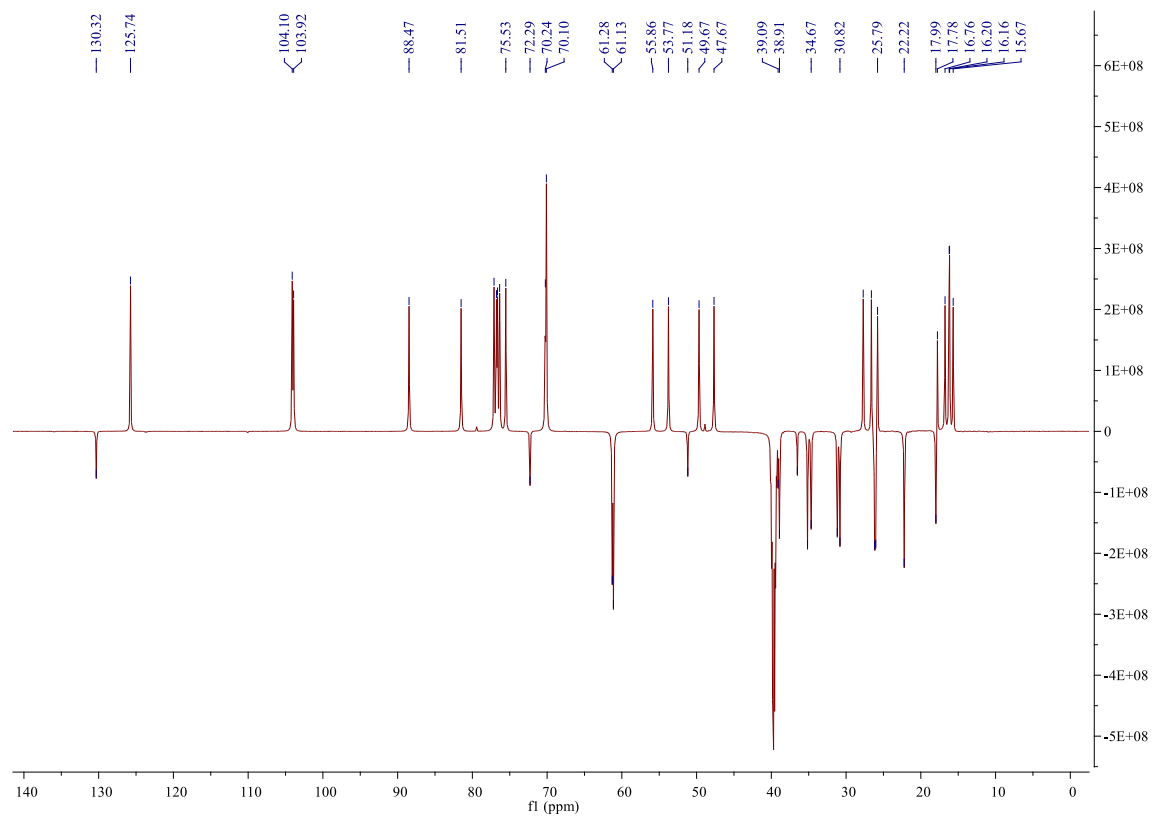

Figure S7-2.  $^{13}\text{C}$ -DEPT NMR spectrum of Rd in DMSO- $\text{D}_6$  (150 MHz).

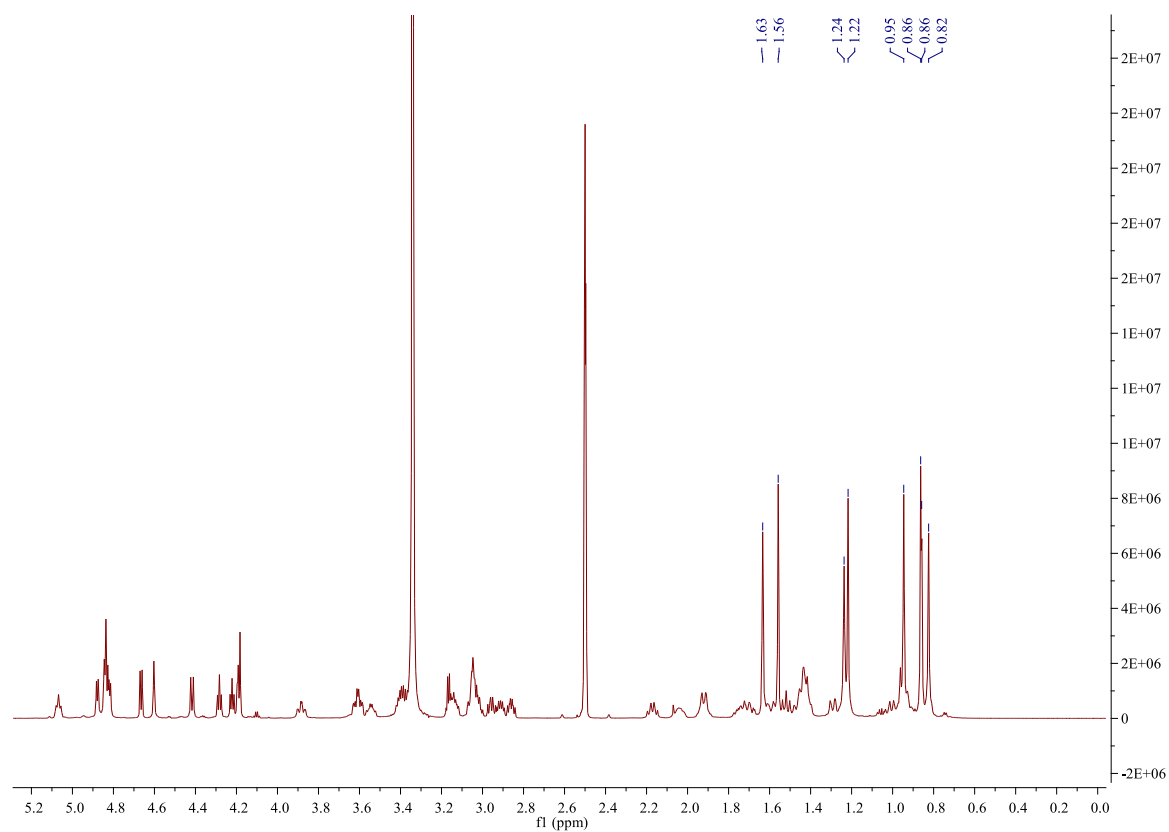

Figure S8-1.  $^1\text{H}$  NMR spectrum of Rg1 in DMSO- $\text{D}_6$  (600 MHz).

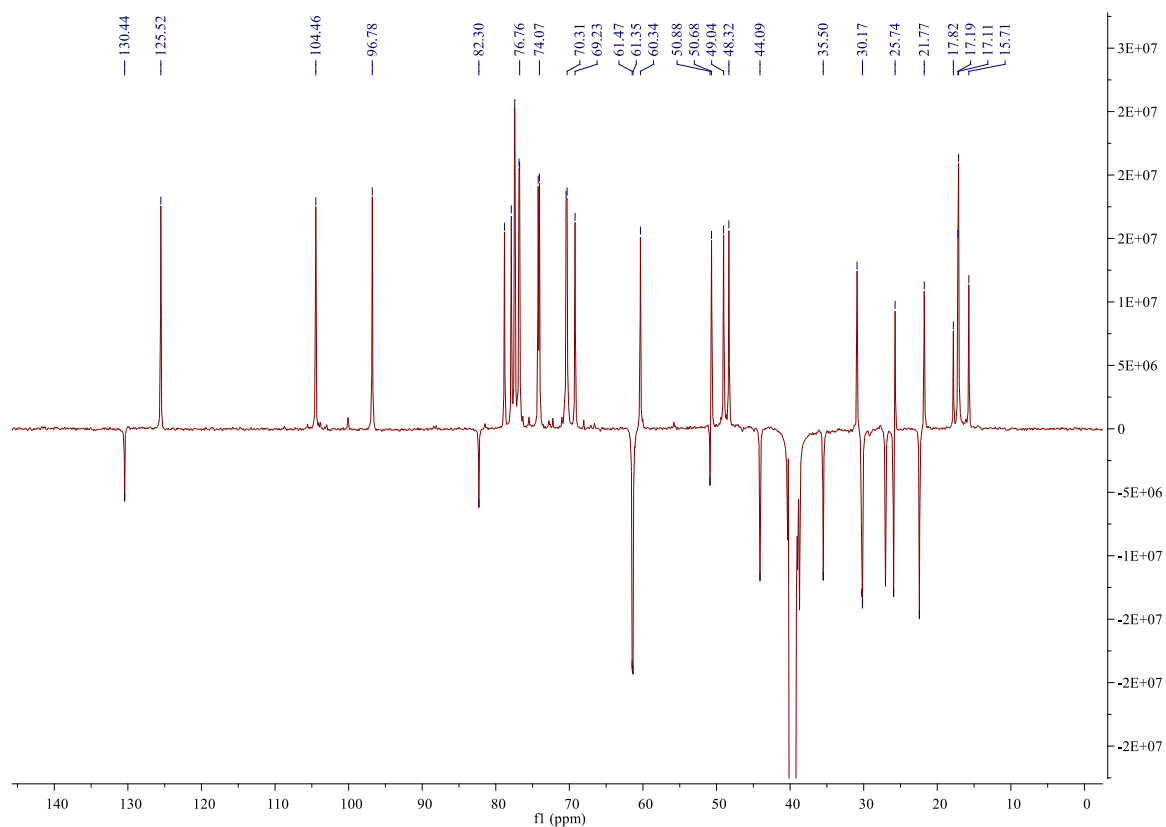

Figure S8-2.  $^{13}\text{C}$ -DEPT NMR spectrum of Rg1 in Pyridine- $\text{D}_6$  (150 MHz).

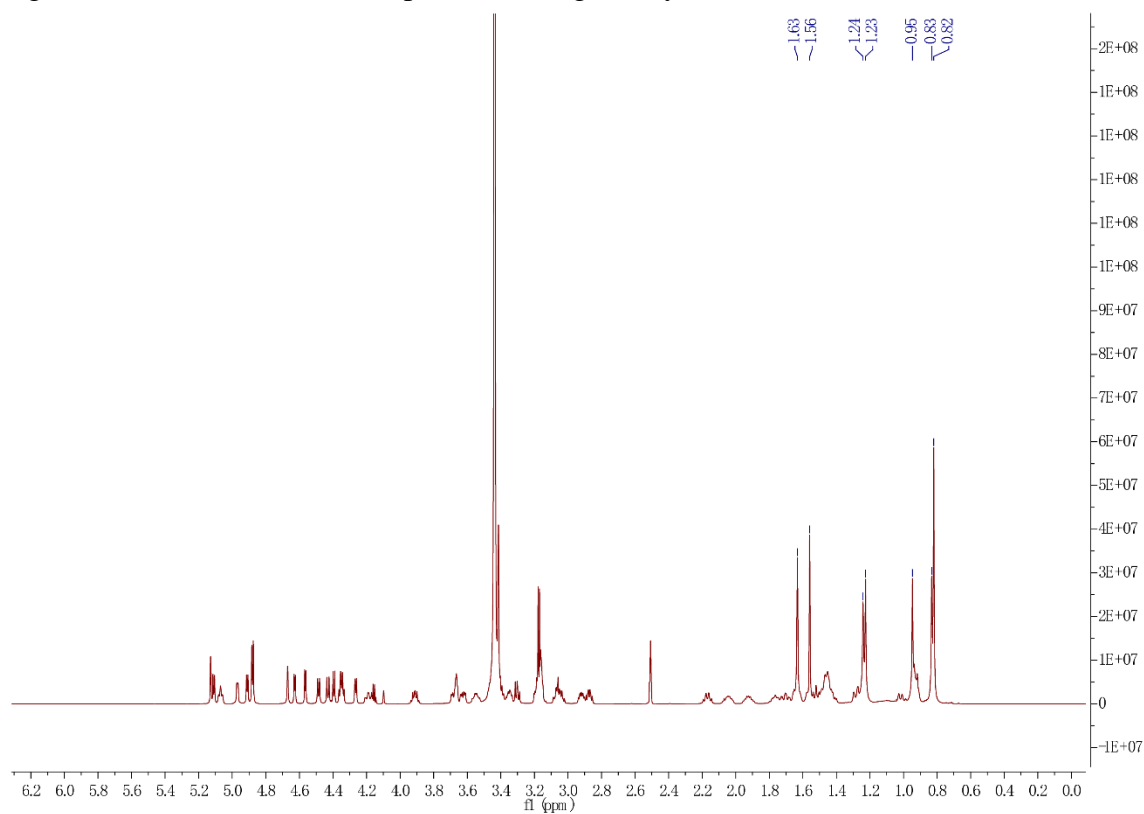

Figure S9-1.  $^1\text{H}$  NMR spectrum of Rh2 in DMSO- $\text{D}_6$  (600 MHz).



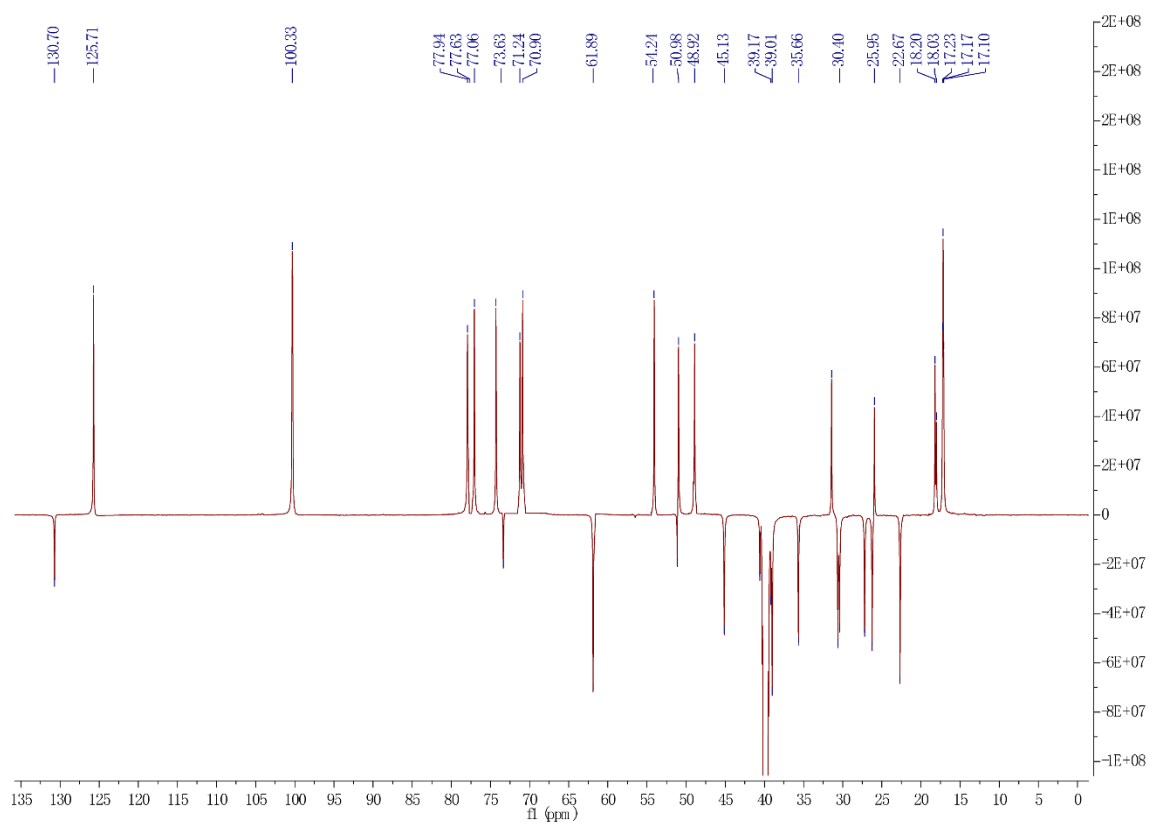

Figure S9-2.  $^{13}\text{C}$ -DEPT NMR spectrum of Rh<sub>2</sub> in DMSO-D<sub>6</sub> (150 MHz).

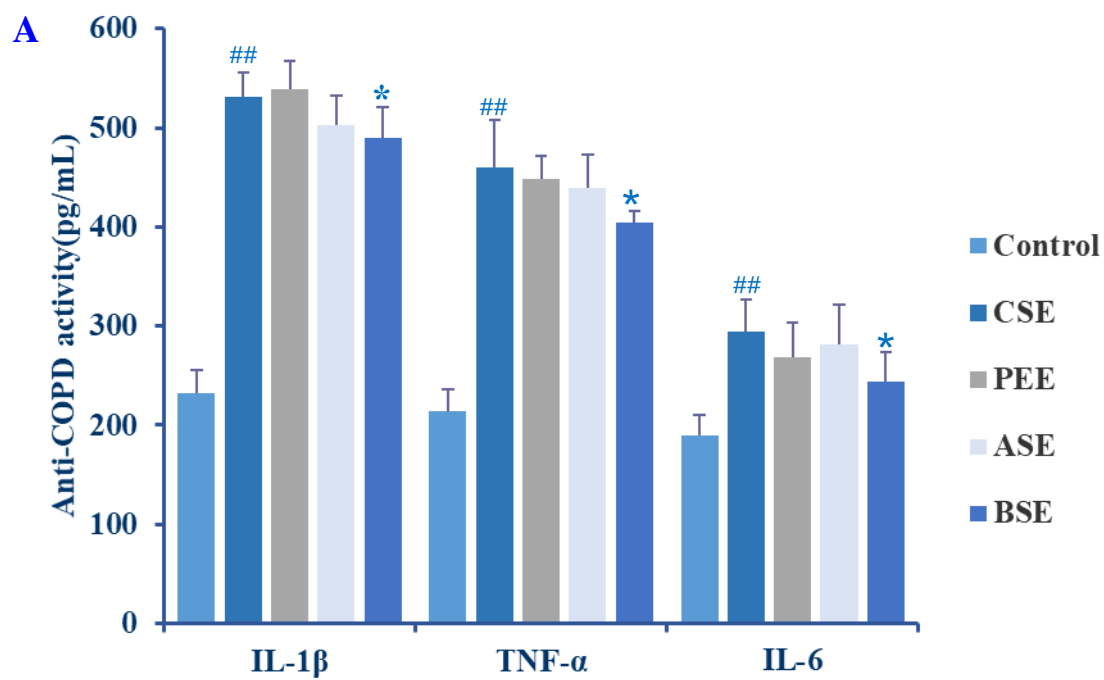

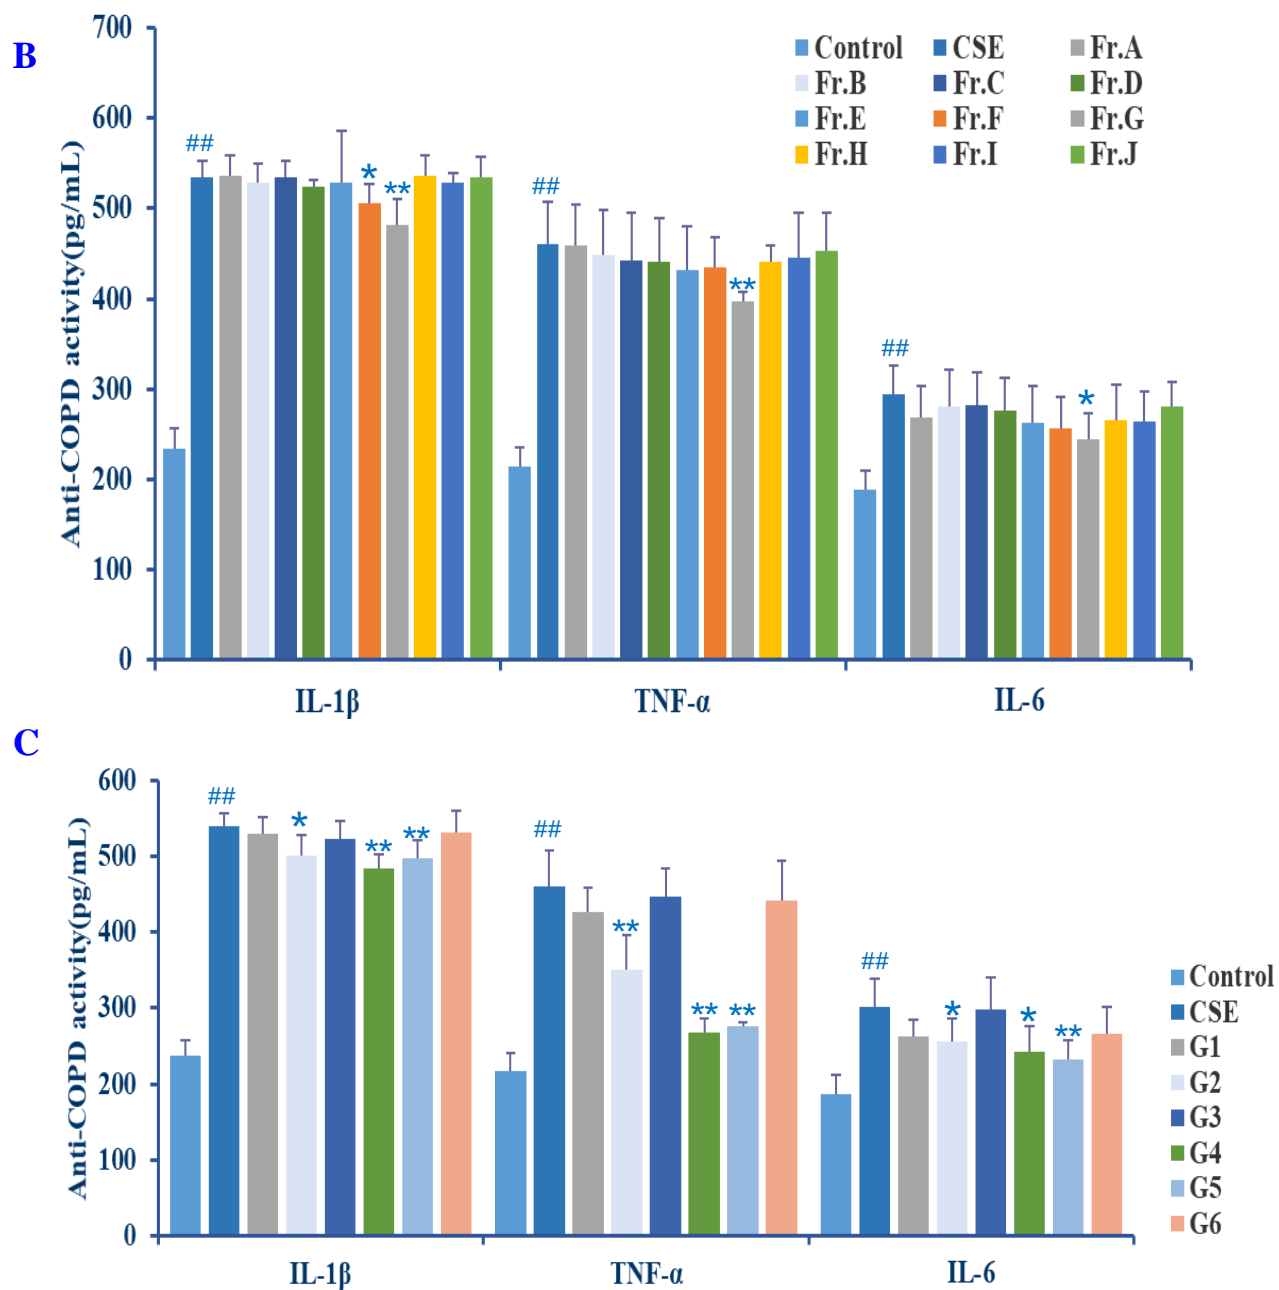

Figure S10. Anti-inflammatory effect of petroleum ether soluble extracts (PEe), ethyl acetate soluble extracts (ASe), n-butanol soluble extracts (BSe) (200  $\mu$ M) (A), FrA-J (B) and G1-6 (C) on the inflammatory cytokine tumor necrosis factor- $\alpha$  (TNF- $\alpha$ ), interleukin-1 $\beta$  (IL-1 $\beta$ ) and interleukin-6 (IL-6) in CSE-exposed A549 cells. The results are expressed as mean  $\pm$  S.D., n=6. ## p < 0.01, compared with control group; \*\* p < 0.01, compared with CSE group; \* p < 0.05, compared with CSE group.
